1 Metagenomic analysis of virus diversity and relative abundance in a eutrophic freshwater  
2 harbour

3 Authors: Christine N. Palermo<sup>1</sup>, Roberta R. Fulthorpe<sup>2</sup>, Rosemary Saati<sup>2</sup>, and Steven M. Short<sup>1</sup>

4

5 <sup>1</sup>University of Toronto Mississauga

6 3359 Mississauga Road, Mississauga, Ontario, Canada

7 <sup>2</sup>University of Toronto Scarborough

8 1265 Military Trail, Scarborough, Ontario, Canada

9

10 Christine N. Palermo: [christine.palermo@mail.utoronto.ca](mailto:christine.palermo@mail.utoronto.ca)

11 Roberta R. Fulthorpe: [fulthorpe@utsc.utoronto.ca](mailto:fulthorpe@utsc.utoronto.ca)

12 Rosemary Saati: [rosemary.saati@mail.utoronto.ca](mailto:rosemary.saati@mail.utoronto.ca)

13 Steven M. Short (corresponding author): [steven.short@utoronto.ca](mailto:steven.short@utoronto.ca)

14

15 Keywords: metagenomics, viral ecology, freshwater virology, microbial communities,

16 virophages

17

18 ABSTRACT

19 Aquatic viruses have been extensively studied over the past decade, yet fundamental aspects of  
20 freshwater virus communities remain poorly described. Our goal was to characterize particle-  
21 associated virus communities seasonally and spatially in a freshwater harbour. Community DNA  
22 was extracted from water samples and sequenced on an Illumina HiSeq platform. Assembled  
23 contigs were annotated as belonging to the virus families *Caudovirales*, *Mimiviridae*,  
24 *Phycodnaviridae*, and virophages (*Lavidaviridae*), or to other groups of undefined viruses.  
25 Diverse *Mimiviridae* contigs were detected in the samples, but the two sites contained distinct  
26 *Mimiviridae* communities. Virophages were often the most abundant group, and discrete  
27 virophage taxa were remarkably stable across sites and dates despite fluctuations in *Mimiviridae*  
28 community composition. *Caudovirales* were present at low abundances in most samples,  
29 contrasting other studies of freshwater environments. Similarly, *Phycodnaviridae* abundances  
30 were surprisingly low in all samples despite the harbour's capacity to support high algal biomass  
31 during the summer and autumn months, suggesting that *Mimiviridae* are the dominant algae-  
32 infecting viruses in this system. Overall, our findings provided insights into freshwater virus  
33 community assemblages by expanding the documented diversity of freshwater virus  
34 communities, highlighting the potential ecological importance of virophages, and revealing  
35 distinct communities over small spatial scales.

36

37

## 38 INTRODUCTION

39 Viruses can modify and control the structure and function of ecosystems and in turn, influence  
40 global biogeochemical cycles and the evolution of organisms [1]. Historically, use of traditional  
41 culture-based methods to study environmental viruses led to underestimations of their abundance  
42 and ecological importance [2], whereas more contemporary molecular methods allowed analyses  
43 of environmental microbial communities without the constraints of cultivation. However, unlike  
44 the prokaryotes and eukaryotes they infect, viruses do not share universally conserved genes that  
45 can be readily targeted to survey entire communities. Thus, viral ecology is a field for which  
46 major advances can be realized through shotgun metagenomic sequencing [3]. Nonetheless,  
47 despite intensive efforts over the past couple of decades, comprehensive knowledge of virus  
48 community diversity and dynamics remains elusive for most natural settings.

49

50 In the first viral metagenomics study, over 65% of sequences recovered from surface seawater  
51 samples were not significantly similar to any sequence in existing databases, highlighting the  
52 lack of knowledge of environmental viruses [4]. Since then, viral sequence databases have  
53 expanded dramatically, in large part due to several large-scale ocean sampling expeditions that  
54 have included viral community analysis (as reviewed in [5]). These sampling expeditions include  
55 the Tara Oceans Expedition, the Malaspina Circumnavigation Expedition, Pacific Ocean Virome  
56 (POV), the San Pedro Ocean Time-series (SPOT), and the Bermuda Atlantic Time-series Study  
57 (BATS). BATS tracked viral abundance in the Sargasso Sea over a decade, while the SPOT  
58 studies measured temporal variation in virus communities and their hosts. The POV was  
59 established with data from transects spanning from coastal waters to the open ocean to document

60 spatial changes in microbial and virus communities, whereas the Tara Oceans and Malaspina  
61 Circumnavigation Expeditions were designed to gather baseline global oceanic biodiversity data.  
62  
63 The Tara Oceans Expedition was conducted from 2009-2013 with the aim of globally sampling a  
64 wide range of organismal and functional diversity in the surface oceans, while the Malaspina  
65 Circumnavigation Expedition sailed from December 2010 to July 2011 with a focus on deep  
66 ocean microbiology. The Tara Oceans Expedition resulted in several important discoveries  
67 related to diverse groups of marine planktonic taxa, including viruses (e.g. [6-10]). Importantly,  
68 this sampling expedition provided data supporting previous observations of high local diversity  
69 but limited global diversity that led to the conception of a ‘seed-bank’ model of virus diversity  
70 [11]. The Tara Oceans survey revealed that virus community composition was strongly impacted  
71 by temperature and oxygen concentrations on local scales due to these factors’ influence on their  
72 hosts, while on larger scales ocean currents were responsible for transporting and mixing a virus  
73 ‘seed-bank’ [6]. Furthermore, using 17 viromes generated from the expedition, the abundance  
74 and diversity of nucleo-cytoplasmic large DNA viruses (NCLDVs) were mapped revealing that  
75 there were approximately  $10^4$ - $10^5$  viruses per ml in the photic zone and that the so-called  
76 ‘Megavirales’ and the *Phycodnaviridae* were the most common NCLDVs in the epipelagic  
77 oceans [12]. Complementing the Tara Oceans Expedition, data stemming from the Malaspina  
78 Circumnavigation Expedition demonstrated that viruses have higher turnover rates in the deep  
79 ocean compared surface waters, and they play important roles in DOC production and nutrient  
80 release, especially in the bathypelagic [13]. By combining viral sequences from the Tara Oceans  
81 and the Malaspina Circumnavigation Expeditions, numerous virus genomes have been  
82 assembled, expanding viral sequence databases more than three-fold [14]. Thus, these

83 expeditions have vastly improved our understanding of marine viral ecology and have  
84 highlighted the global importance of virus activity.

85  
86 Though extensive surveys of marine virus communities have been conducted, relatively little is  
87 known about fundamental aspects of freshwater virus ecology, such as their distribution in the  
88 environment. Despite their underrepresentation in databases, research has demonstrated that  
89 freshwater virus communities contain novel viruses and are distinct from other aquatic virus  
90 communities [15-17]. Metagenomics has been used to study virus communities in natural  
91 freshwater lakes from the Arctic [18], Canada [19], USA [20,21], Ireland [22], France [17],  
92 China [23], and Antarctica [24,25]. With respect to virus communities in eutrophic lakes, studies  
93 by Green et al. [20], Skvortsov et al. [22], and Ge et al. [23] revealed virus communities  
94 dominated by *Caudovirales* in the epilimnion of eutrophic lakes in China, USA, and Ireland,  
95 respectively, but other dsDNA viruses, unclassified bacteriophages, and ssDNA viruses were  
96 also detected albeit at lower abundances. Roux et al. [26] focused on the viroplage and NCLDV  
97 communities in a eutrophic freshwater lake in USA, and observed highly dynamic viroplage  
98 communities lacking any apparent annual or seasonal patterns of abundance. Although viral  
99 sequence databases have expanded rapidly alongside knowledge of marine virus ecology,  
100 documenting virus diversity and activity in disparate freshwater environments remains an  
101 exciting and untapped area for research.

102  
103 The goal of the research described here was to characterize the virus community in Hamilton  
104 Harbour, a eutrophic freshwater embayment of Lake Ontario. The harbour is located at the  
105 western end of Lake Ontario and has an area of 21.5-km<sup>2</sup> and an average depth of 13 m. It is

106 separated from Lake Ontario by a naturally occurring sandbar and the Burlington Shipping Canal  
107 [27], and is the largest Canadian port in the Great Lakes [28]. The area surrounding the harbour  
108 has a long history of industrial activity, resulting in a highly polluted harbour containing heavy  
109 metals and many other hazardous contaminants [29,30]. Moreover, inputs from wastewater  
110 treatment plants, stormwater and sewage overflow, and agricultural and urban runoff have led to  
111 high nutrient concentrations, especially phosphorus. Thus, Hamilton Harbour is a eutrophic  
112 system that experiences seasonal blooms of cyanobacteria and algae, poor water clarity, and  
113 depleted hypolimnetic oxygen. As a result of all these perturbations, the harbour was designated  
114 an ‘Area of Concern’ in the amended 1987 USA-Canada Great Lakes Water Quality Agreement  
115 (GLWQA). Despite its designation over 30 years ago and ongoing remediation efforts, Hamilton  
116 Harbour remains one of the most impaired sites in the Canadian Great Lakes [31].

117

118 While Hamilton Harbour is in general an extensively studied system, the microbial community  
119 has only been examined using microscopic techniques to investigate microbial diversity and  
120 abundance. To our knowledge, there are no published studies characterizing the microbial  
121 community in Hamilton Harbour using metagenomics, nor are there any studies of the virus  
122 community in Hamilton Harbour. The metagenomic dataset used in this study was originally  
123 generated to study Hamilton Harbour bacteria and eukaryotic plankton, but was leveraged herein  
124 to provide an initial assessment of the cell- and particle-associated virus community and to  
125 determine if seasonal and spatial patterns of diversity and abundance could be discerned in this  
126 unique freshwater environment. More research is required to better characterize freshwater virus  
127 diversity, community structures, and patterns of abundance, and the factors that drive these

128 phenomena. This research aims to address these knowledge gaps by providing a detailed view of  
129 the virus community in Hamilton Harbour.

130

## 131 MATERIALS AND METHODS

### 132 *Sampling Sites and Collection*

133 Water samples were collected from two long-term Environment Canada monitoring sites in  
134 Hamilton Harbour (referred to as stations 1001 and 9031 in previous publications). One site  
135 (station 1001) is located at the deepest and most central part of the harbour (43°17'17.0"N  
136 79°50'23.0"W) with a water depth of 24 m and a 1.2 km distance from the shoreline. The other  
137 site (station 9031) is located less than 0.5 km from the shoreline (43°16'50.0"N 79°52'32.0"W),  
138 with a water depth of 12 m. This “nearshore” site is influenced by effluents from the Cootes  
139 Paradise watershed on the west end of the harbour, while the “mid-harbour” site is closer to the  
140 Burlington Shipping Canal and Lake Ontario. In 2015, water samples for metagenomic analyses  
141 were collected on July 30<sup>th</sup>, August 13<sup>th</sup> and 27<sup>th</sup>, and September 10<sup>th</sup> and 24<sup>th</sup>, from both sites at  
142 approximately 1 m below the surface using a Van Dorn bottle sampler; in total, 10 samples were  
143 collected, 5 from each of the nearshore and mid-harbour sites. 500 ml water samples were  
144 filtered through 0.22 µm pore-size Sterivex capsule filters (EMD Millipore, USA), and the filters  
145 were sealed and stored at -80°C until further analysis. For each sample collected, physiochemical  
146 parameters including pH, dissolved oxygen, temperature, redox potential, and chlorophyll a were  
147 measured *in situ* using a YSI 58 (Xylem Inc., USA). Secchi depth was also measured with each  
148 sample.

149

### 150 *DNA Extraction and Sequencing*

151 To extract community DNA from each sample, biomass was recovered from the filters by adding  
152 2 ml of molecular grade nuclease free water to each filter and vortexing for 5 minutes. The  
153 resuspended material was transferred to a 1.5 ml microcentrifuge tube under sterile conditions  
154 and was centrifuged at 6,000 x g for a total of 15 minutes. DNA was extracted from the pelleted  
155 material using a FastDNA SPIN Kit (MP BIO, USA), beginning with the addition of 500 µl of  
156 CLS-Y solution. The manufacturer's protocol was followed except the wash step was repeated  
157 three times to maximize removal of environmental contaminants. Following extraction, DNA  
158 concentrations were estimated using a NanoDrop ND-1000 UV-Vis Spectrophotometer  
159 (NanoDrop Technologies, USA), and were standardized to 1.5 µg of DNA per sample before  
160 being sent for library preparation and shotgun metagenome sequencing by MR. DNA (Molecular  
161 Research LP, USA).

162  
163 Sample DNA libraries were prepared using a Nextera DNA Sample Preparation Kit (Illumina,  
164 USA), following the manufacturer's protocol. DNA concentrations were measured using the  
165 Qubit dsDNA HS Assay Kit (Life Technologies, USA) before and after library preparation  
166 (Table 1). Prior to library preparation, samples were diluted to achieve the recommended  
167 concentration of 2.5 ng µl<sup>-1</sup>. For the August 27 nearshore and mid-harbour sites, achieving a  
168 concentration of 2.5 ng µl<sup>-1</sup> was not possible, so the maximum volume (20 µl) of each sample  
169 was used for these libraries. Average library size was determined using an Agilent 2100  
170 Bioanalyzer (Agilent Technologies, USA). Each library was clustered using a cBot System  
171 (Illumina, USA), and was sequenced from paired ends using 500 cycles with the HiSeq 2500 (2 x  
172 250 bp) system (Illumina, USA).

173



174 **Table 1:** Initial DNA concentration, final library concentration, and average fragment size in the  
175 library for each of the 10 samples in this study.

| <b>Sample</b>              | <b>Initial DNA Concentration (ng/μl)</b> | <b>Library Concentration (ng/μl)</b> | <b>Average Library Size (bp)</b> |
|----------------------------|------------------------------------------|--------------------------------------|----------------------------------|
| July 30 – Nearshore        | 5.30                                     | 16.2                                 | 985                              |
| July 30 – Mid-harbour      | 2.84                                     | 18.3                                 | 1070                             |
| August 13 – Nearshore      | 2.76                                     | 17.5                                 | 1070                             |
| August 13 – Mid-harbour    | 3.40                                     | 14.5                                 | 1000                             |
| August 27 – Nearshore      | 2.28*                                    | 15.0                                 | 950                              |
| August 27 – Mid-harbour    | 1.42*                                    | 8.94                                 | 615                              |
| September 10 – Nearshore   | 9.58                                     | 12.0                                 | 1000                             |
| September 10 – Mid-harbour | 10.6                                     | 14.1                                 | 1060                             |
| September 24 – Nearshore   | 9.10                                     | 15.7                                 | 1030                             |
| September 24 – Mid-harbour | 2.68                                     | 17.7                                 | 900                              |

176 \* denotes that samples could not be adjusted to 2.5 ng/μL prior to library preparation.

177

### 178 *Metagenome Data Processing*

179 After sequencing and base-calling, adapters and barcodes were removed by MR DNA  
180 (Molecular Research LP, USA). Read quality parameters were verified using FastQC version  
181 0.11.5 [32] prior to quality control and once again prior to assembly. Quality control was  
182 performed using a sliding window method with the program Sickle version 1.33 [33] using a  
183 quality score cut-off value of 30. All reads shorter than 50 bp were removed prior to assembly.  
184 Reads were assembled using IDBA-UD version 1.1.3 [34] with alterations to the source code to  
185 accommodate longer read lengths and higher maximum k values (as in [22]). The de Bruijn

186 graph-based assembly was performed using k values from 20 to 200 in increments of 20. A  
187 minimum k-mer count of 1 was used in the assembly to maximize assembly of the low coverage  
188 reads. Contig alignment was achieved with BLASTx against the April 2018 NCBI-nr database  
189 downloaded from <ftp://ftp.ncbi.nih.gov/blast/db/FASTA/nr.gz>. DIAMOND version 0.9.19 [35]  
190 was used for alignment with frameshift alignment and very sensitive modes activated.  
191 MEGAN6-LR version 6.11.4 [36] was used to annotate contigs using the Lowest Common  
192 Ancestor (LCA) algorithm in long read mode with a bit score cut-off value of 100 and a  $10^{-6}$  e-  
193 value cut-off. The March 2018 MEGAN protein accession mapping file was downloaded from  
194 <http://ab.inf.uni-tuebingen.de/data/software/megan6/download/welcome.html>. Quality controlled  
195 reads were mapped back to assembled contigs using Bowtie 2 [37] in very sensitive mode, and  
196 mapping information for each contig was extracted using SAMtools [38]. Table 2 summarizes  
197 the number of reads and contigs at each step in the pipeline for each sample.  
198

199 **Table 2:** Summary of the number of reads and contigs at each step in the data processing  
200 pipeline

| Sample                  | Reads pre-QC | Reads post-QC | Contigs post-assembly (Mean length) | Contigs assigned | Virus contigs assigned | Percent of virus contigs |
|-------------------------|--------------|---------------|-------------------------------------|------------------|------------------------|--------------------------|
| July 30 – Nearshore     | 13,403,832   | 11,608,892    | 480,233 (693)                       | 212,156          | 349                    | 0.16                     |
| July 30 – Mid-harbour   | 13,206,316   | 11,246,470    | 433,927 (824)                       | 256,277          | 397                    | 0.15                     |
| August 13 – Nearshore   | 12,758,364   | 11,040,814    | 398,774 (741)                       | 196,128          | 488                    | 0.25                     |
| August 13 – Mid-harbour | 13,104,992   | 11,414,576    | 416,468 (821)                       | 273,693          | 662                    | 0.24                     |
| August 27 – Nearshore   | 15,685,750   | 13,953,600    | 374,464 (662)                       | 128,233          | 484                    | 0.38                     |

|                               |            |            |                  |         |     |      |
|-------------------------------|------------|------------|------------------|---------|-----|------|
| August 27 –<br>Mid-harbour    | 16,101,196 | 14,751,904 | 233,868<br>(834) | 183,817 | 232 | 0.13 |
| September 10 –<br>Nearshore   | 16,228,148 | 14,257,158 | 418,490<br>(609) | 110,567 | 463 | 0.42 |
| September 10 –<br>Mid-harbour | 15,411,142 | 13,561,346 | 443,692<br>(568) | 64,142  | 604 | 0.94 |
| September 24 –<br>Nearshore   | 14,689,040 | 12,764,018 | 367,778<br>(629) | 112,144 | 372 | 0.33 |
| September 24 –<br>Mid-harbour | 13,151,390 | 11,228,970 | 296,813<br>(777) | 185,913 | 104 | 0.06 |

201

## 202 *Metagenome Data Analysis*

203 Once taxonomic assignments were applied to contigs, their relative abundances were estimated  
204 after normalizing by contig length and sequencing depth per sample. The number of reads that  
205 mapped to each contig was divided by the contig length in kbp. These values were summed for  
206 all contigs in a sample and were divided by a normalizing factor of 1000. Then, the number of  
207 mapped reads per kbp was divided by the normalized sum to achieve a relative abundance count  
208 that could be compared to other groups within and between samples. All virus contig  
209 assignments were sorted into one of the following categories based on the NCBI taxonomic  
210 classifications: *Caudovirales*, *Mimiviridae*, *Phycodnaviridae*, virophages (*Lavidaviridae*),  
211 *Iridoviridae*, *Poxviridae*, other dsDNA viruses, ssDNA viruses, unclassified bacterial viruses,  
212 and unclassified viruses. Because the assigned taxonomic classifications for some contigs in the  
213 “unclassified bacterial viruses” and “unclassified viruses” categories were less specific than  
214 information provided in the literature within which they were originally reported, some contigs  
215 in these categories were manually curated and were assigned to more specific groups based on  
216 published information (Table S1).

217

218 As well as assigning some contigs to more specific categories, some of the more specific  
219 assignments in the dsDNA viruses group were re-assigned to the “Other dsDNA viruses” group  
220 if they were observed in less than half of the samples and at <0.5% abundance. For example,  
221 contigs annotated as *Marseilleviridae* were only observed in 2 of the 10 samples at < 0.2 %  
222 abundance. Because there was not enough representation to making meaningful comparisons, the  
223 *Marseilleviridae* were grouped together with the “Other dsDNA viruses”. As a final note, in one  
224 sample a single contig was annotated as an RNA virus, and this contig was re-assigned to the  
225 “Unclassified viruses” category (Table S1).

226  
227 There is evidence that some viruses previously and tentatively considered phycodnaviruses (i.e.,  
228 members of the *Phycodnaviridae* family) are more closely related to *Mimiviridae* than  
229 *Phycodnaviridae*, and in fact form a separate subfamily ‘Mesomimivirinae’ within the  
230 *Mimiviridae* [39]. Though not formally recognized by the International Committee for  
231 Taxonomy of Viruses (ICTV), several publications have used the terms ‘*Megaviridae*’ or  
232 ‘extended *Mimiviridae*’ to refer to ‘Mesomimivirinae’ [40]. Here we will use the term  
233 *Mimiviridae* to encompass the formally recognized *Mimiviridae* as well as the proposed  
234 ‘extended *Mimiviridae*’ subfamily that are often considered phycodnaviruses. Proposed members  
235 of the ‘Mesomimivirinae’ include Organic Lake phycodnaviruses (OLPVs), *Aureococcus*  
236 *anophagefferens* virus (AaV), *Chrysochromulina ericina* virus (CeV), *Phaeocystis pouchetii*  
237 virus (PpV), *Pyramimonas orientalis* virus (PoV), and Group I *Phaeocystis globosa* viruses  
238 (PgVs) [39,41-44]. Based on these recent developments, we manually curated the affiliation of  
239 viruses that belong to the proposed Mesomimivirinae group but were annotated as

240 *Phycodnaviridae* in the current NCBI scheme (accessed April 2018), as viruses within the  
241 *Mimiviridae* (Table S1).

242

243 A boxplot of the overall virus community was generated using the “ggplot2” package [45] in  
244 RStudio. Bray-Curtis dissimilarity with unweighted pair group method with arithmetic mean  
245 (UPGMA) clustering was used to determine which samples were most similar based on relative  
246 abundances of different virus groups. The relationship between the relative abundance of virus  
247 groups, environmental parameters (dissolved oxygen, pH, chlorophyll a, temperature, Secchi  
248 depth, and redox potential), and sites, was statistically tested using canonical correspondence  
249 analysis (CCA); tests of 10,000 permutations were used to compute the significance of the model  
250 and the variables. Cluster analysis and CCA were computed using the “vegan” package [46] in  
251 RStudio. For samples collected on July 30<sup>th</sup>, and September 10<sup>th</sup> and 24<sup>th</sup>, data were available for  
252 other factors including: ammonia, chloride, fluoride, sulfate, particulate organic carbon,  
253 particulate organic nitrogen, nitrate and nitrite, total dissolved nitrogen, total phosphorus, total  
254 dissolved phosphorus, total particulate phosphorus, and soluble reactive phosphorus. Separate  
255 CCA models were tested for the entire dataset and the subset of dates for which additional data  
256 were available.

257

## 258 RESULTS

### 259 *Virus community composition in Hamilton Harbour*

260 Diverse virus contigs were identified in Hamilton Harbour and some were classified within the  
261 virus families *Caudovirales*, *Mimiviridae*, *Phycodnaviridae*, virophages (*Lavidaviridae*), while  
262 others could only be classified as belonging to *unclassified bacteriophages*, *other dsDNA*

263 *viruses*, and *ssDNA viruses*. Henceforth, for the sake of brevity, we will name only virus groups  
264 when referring to contigs annotated as viruses from those groups. Overall, virophages were the  
265 most abundant (44.7% average abundance across all samples) but were also the most variable  
266 (from 0.1% to 74.5% abundance). The *Mimiviridae* were the second most abundant group,  
267 comprising an average of 21.1% of the virus community across all samples. Interestingly, though  
268 they are intimately associated, the abundances of *Mimiviridae* (ranging from 8.2% to 36.0%  
269 abundance) did not fluctuate to the same extent as the virophages (Figure 1). At the nearshore  
270 site, virophages represented a large percentage of the virus community in every sample with  
271 abundances between 47.4% and 71.7%, yet their abundances fluctuated widely at the mid-  
272 harbour site ranging from 0.12% to 74.5%. *Mimiviridae* were consistently detected as a  
273 substantial proportion of the community in the nearshore samples with relative abundances  
274 ranging from 18.2% to 34.6% overall. Again, like the virophages, *Mimiviridae* abundances were  
275 more variable at the mid-harbour site, comprising between 8.2% and 36.0% of all virus contigs.  
276 Similarly, *Caudovirales* consistently represented less than 5.0% of the virus community in the  
277 nearshore samples, but ranged from 1.3% to 73.9% at the mid-harbour site. *Phycodnaviridae*  
278 were a minor component of the virus community in all samples, representing only 0.09% to 3.3%  
279 at the nearshore site and 0.05% to 1.9% at the mid-harbour site (Figure 2).

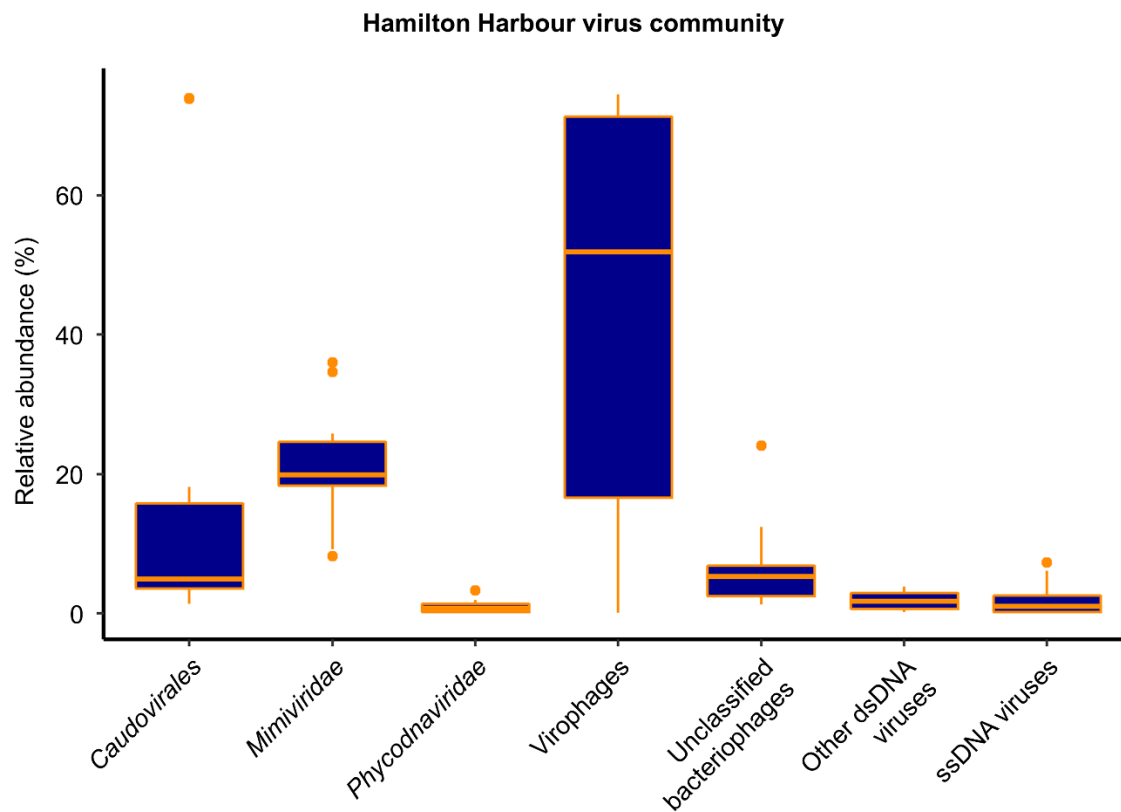

280

281 **Figure 1:** Boxplot of the overall virus community in Hamilton Harbour based on all 10

282 metagenomes from the 5 sampling dates at the nearshore and mid-harbour sites.

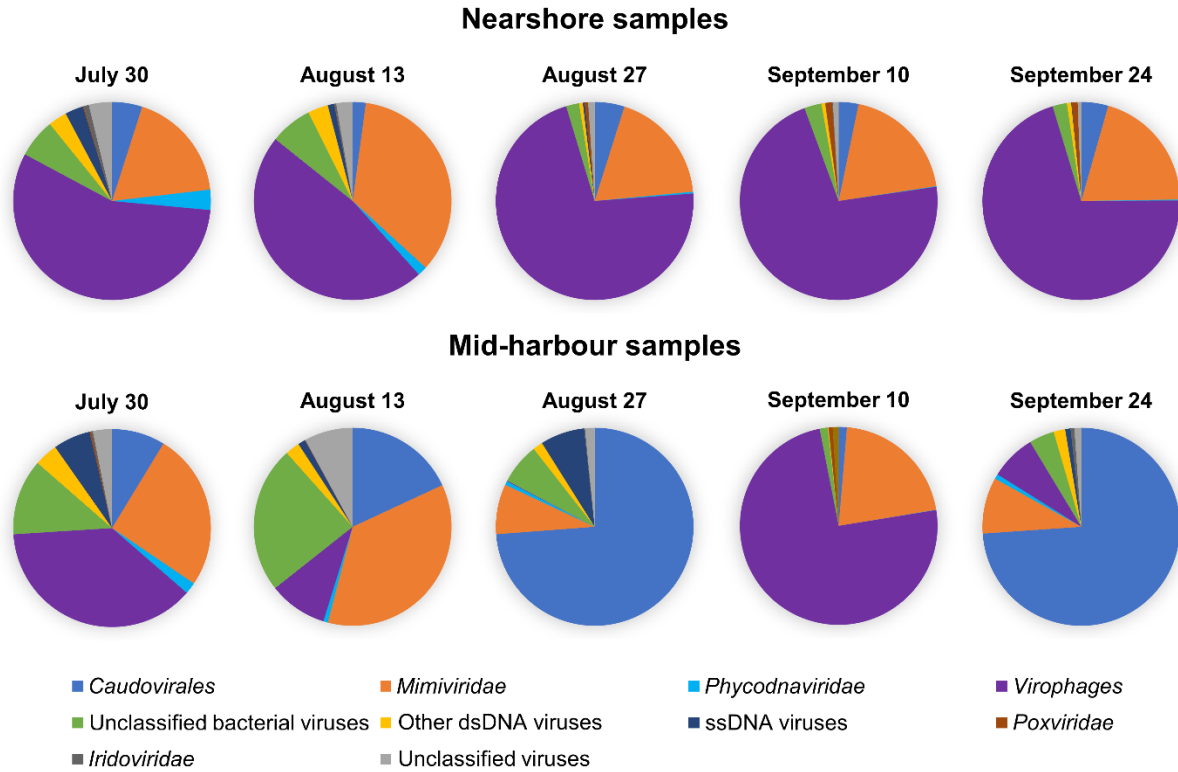

283

284 **Figure 2:** Individual virus communities for each of the 10 metagenomes.

285

286 In general, the abundance of different groups of viruses was more variable in the mid-harbour  
287 compared to the nearshore samples. Sample similarity based on community composition was  
288 assessed using UPGMA clustering of a Bray-Curtis dissimilarity matrix and reinforced this  
289 contrast of the nearshore and mid-harbour sites (Figure 3a). Though the nearshore and mid-  
290 harbour samples did not form distinct clusters overall, the nearshore samples clustered more  
291 closely together than the mid-harbour samples. The community composition at the two sites  
292 clustered together on July 30<sup>th</sup> and September 10<sup>th</sup>, but resolved to distinct clusters on August  
293 13<sup>th</sup>, August 27<sup>th</sup> and September 24<sup>th</sup>.



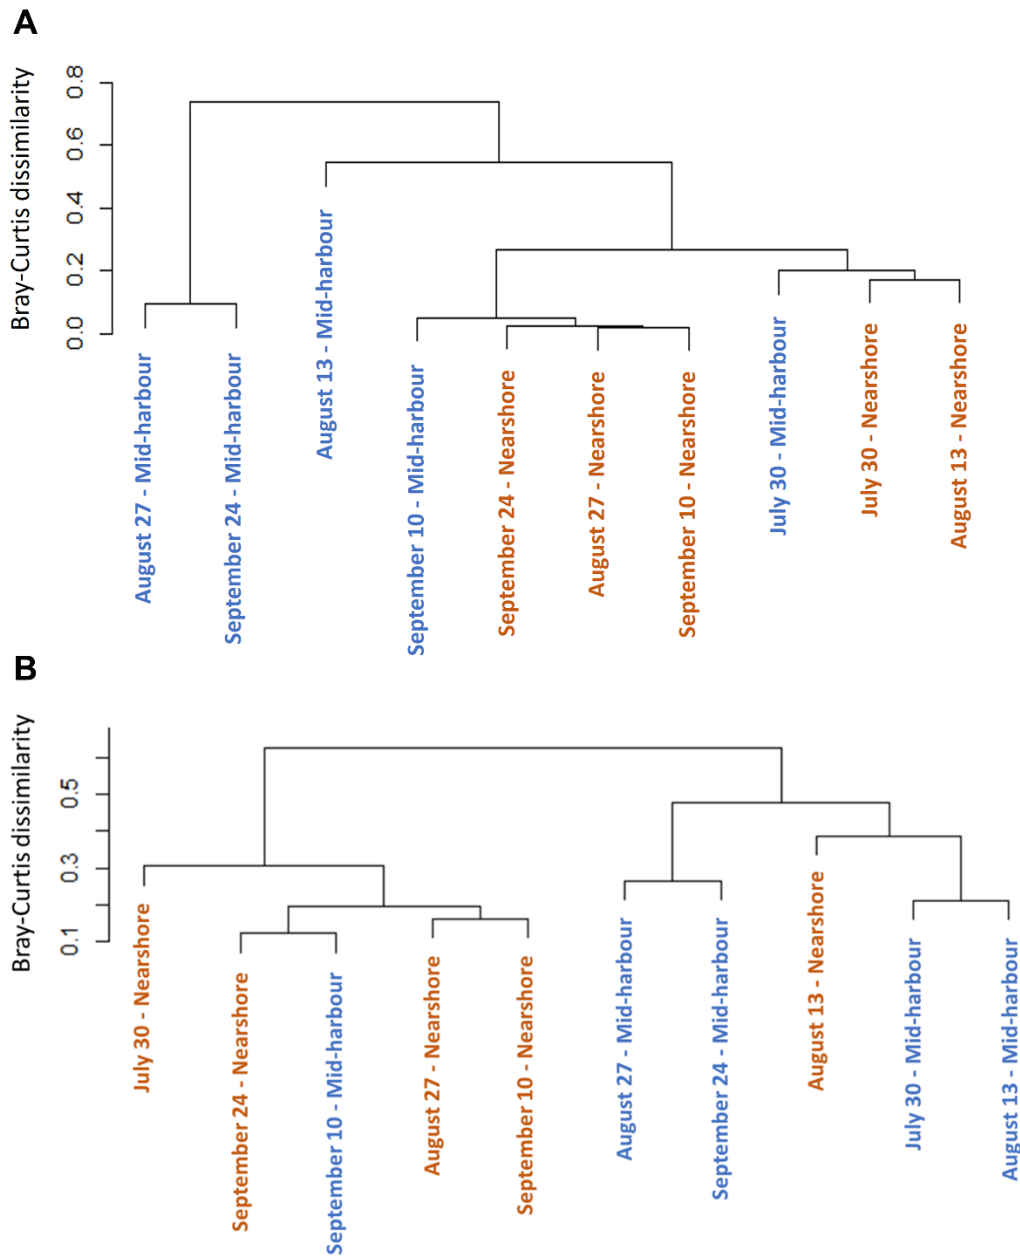

294

295 **Figure 3:** Dendrogram of cluster analysis based on Bray-Curtis dissimilarity index of the **a)**  
296 overall virus community and **b)** *Mimiviridae* community. Nearshore samples are coloured orange  
297 and mid-harbour samples are coloured blue.

298

299

300 *Mimiviridae* community composition in Hamilton Harbour

301 Diverse *Mimiviridae* contigs were detected in Hamilton Harbour, including representatives of all  
302 subgroups and proposed subgroups. Most notably, the proposed ‘Klosneuvirinae’ subfamily [47]  
303 comprised a large proportion of the *Mimiviridae* community, ranging from 17.5% to 79.0%  
304 across all samples, and representing an average of 67.4% and 41.7% of the *Mimiviridae*  
305 community at the nearshore site and mid-harbour site, respectively. In general, the nearshore and  
306 mid-harbour sites appeared to host distinct *Mimiviridae* communities, a notion supported the  
307 Bray-Curtis dissimilarity clustering analysis (Figure 3b); samples from the two sites clustered  
308 separately, with the exceptions of September 10<sup>th</sup> at the mid-harbour site and August 13<sup>th</sup> at the  
309 nearshore site. In all nearshore samples and on September 10<sup>th</sup> at the mid-harbour site, *Indivirus*  
310 *ILVI* were the most abundant representatives of the *Mimiviridae* community, while  
311 *Chrysochromulina ericina* viruses (CeV) were the most abundant *Mimiviridae* in all mid-  
312 harbour samples except on September 10<sup>th</sup> (Figure 4) when *Indivirus ILVI* were again dominant.  
313

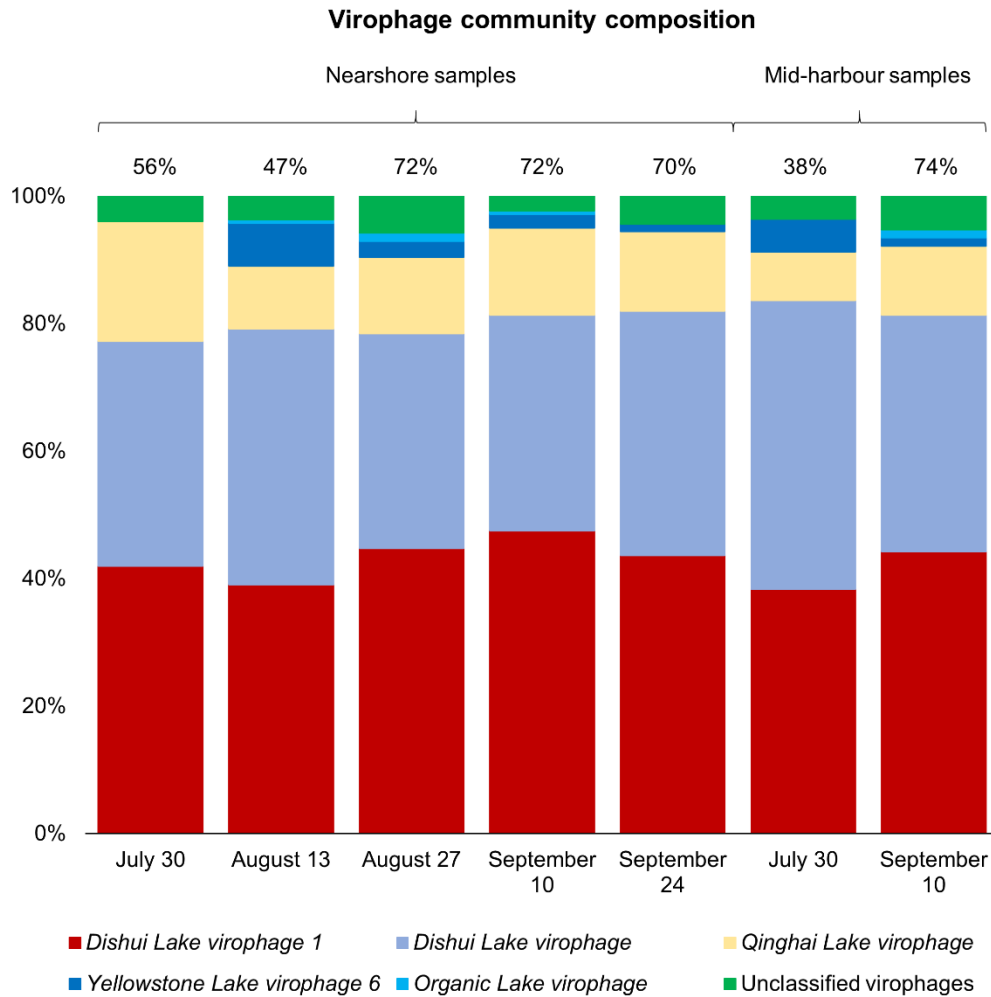

314

315 **Figure 4:** Virophage community composition in samples where virophages represent >10% of  
 316 the total virus community. Numbers above bars are percentages of the total virus community that  
 317 the entire bar represents.

318

319 Of the proposed subfamily ‘Mesomimivirinae’, Organic Lake phycodnavirus, Yellowstone Lake  
 320 mimivirus and *Chrysochromulina ericinia* virus were the most abundant. The “Other  
 321 *Mimiviridae*” category was created for *Mimiviridae* that were present in only a few of the  
 322 samples and always at less than 2.0% of the community, and included the following

323 Mesomimivirinae members: *Aureococcus anophagefferens*, *Phaeocystis pouchetii*, *Pyramimonas*

324 *orientalis*, and *Phaeocystis globosa*. Also placed in the “Other *Mimiviridae*” category were  
325 *Acanthamoeba polyphaga* mimivirus, unclassified *Megaviridae*, Megavirus Iba, Powai Lake  
326 megavirus, and Mimivirus AB-566-O17, which were detected in 6 of the samples at less than  
327 6.0% relative abundance.

328

### 329 *Virophage community composition in Hamilton Harbour*

330 Given the similarity of virus community composition in the nearshore samples, we explored  
331 whether this consistency was upheld at the level of discrete taxa in the most abundant group, the  
332 virophages. Across all nearshore samples, virophage community composition was very similar  
333 regardless of date and contigs were annotated as five types of virophages: Dishui Lake  
334 virophage, Dishui Lake virophage 1, Yellowstone Lake virophage 6, Qinghai Lake virophage,  
335 and Organic Lake virophage (Figure 5). Across all samples, the majority of virophage contigs  
336 were most similar to Dishui Lake virophage 1 (43.4% average) and Dishui Lake virophage  
337 (36.3% average). Qinghai Lake virophages comprised 13.3% of the communities on average, and  
338 the Yellowstone Lake virophages were observed at lower abundances averaging only 2.5% of the  
339 virophage community. Least abundant were the Organic Lake virophages, which were detected  
340 at 0.5% abundance on average and were only detectable in 3 of the 5 nearshore samples.  
341 Unclassified virophage contigs were also detected at low abundances on all dates, averaging  
342 4.0% of the virophage community. Overall, from July 30<sup>th</sup> to September 24<sup>th</sup> the virophage  
343 community composition at the nearshore site was remarkably similar. In contrast to virophage  
344 communities at nearshore sites, the mid-harbour samples from July 30<sup>th</sup> and September 10<sup>th</sup> were  
345 the only samples with virophage populations comprising >10% of the total virus community.  
346 Again, both samples were dominated by the Dishui Lake virophages (Dishui Lake virophage 1

347 and Dishui Lake virophage), which comprised about 80% of the total virophage population.  
 348 Regardless of site or date, the contigs most closely resembled virophages originally identified in  
 349 Dishui Lake, China (Figure 5).  
 350

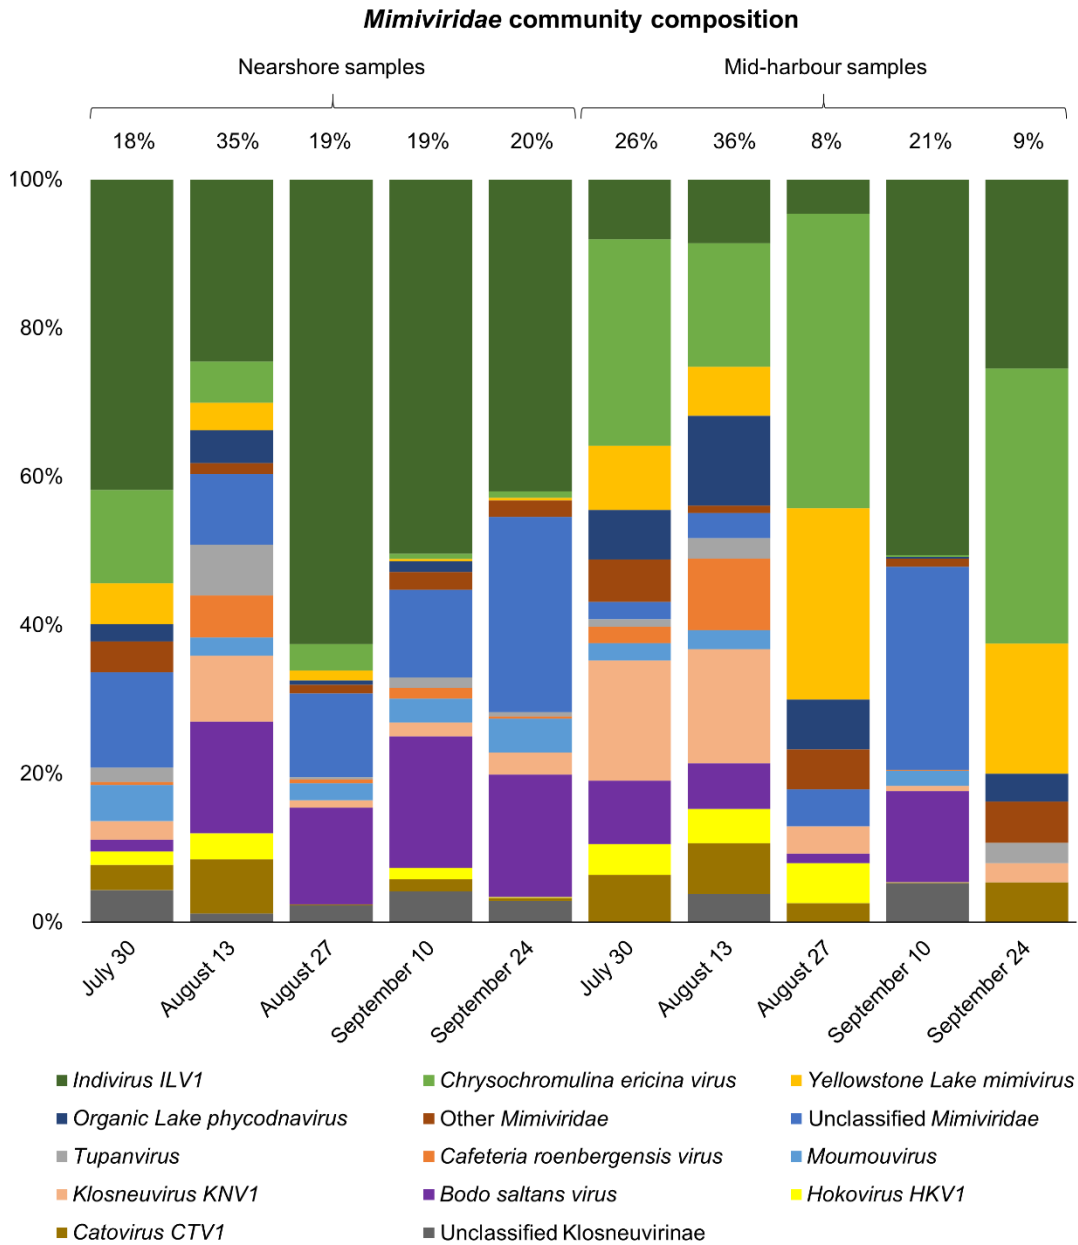

351

352 **Figure 5:** *Mimiviridae* community composition at the nearshore and mid-harbour sites from July  
353 30<sup>th</sup> to September 24<sup>th</sup>. Numbers above bars are percentages of the total virus community that the  
354 entire bar represents.

355

### 356 *Influence of environmental parameters on virus community composition*

357 A canonical correspondence analysis (CCA) was performed to assess the influence of pH,  
358 temperature, redox potential, dissolved oxygen, Secchi depth and chlorophyll a on the viral  
359 groups at each site. The CCA model explained 47.8% ( $F = 7.12$ ,  $\text{Pr}(>F) = 0.005$ ) of the  
360 variability in the data. A test of 10,000 permutations revealed that chlorophyll a concentration  
361 was the only significant environmental parameter of those assessed. Temperature, pH, dissolved  
362 oxygen, Secchi depth, and redox potential were not significant explanatory factors of changes in  
363 virus community composition and relative abundances between samples. However, there was a  
364 strong inverse relationship of *Caudovirales* and chlorophyll a concentration. The August 27<sup>th</sup> and  
365 September 24<sup>th</sup> mid-harbour samples, which are dominated by *Caudovirales* (>70%), were  
366 similar in community composition (Figure 3a) and were negatively correlated with chlorophyll a.  
367 All nearshore samples clustered closely together and were positively correlated with chlorophyll  
368 a. Several parameters including ammonia, chloride, fluoride, sulfate, particulate organic carbon,  
369 particulate organic nitrogen, nitrate and nitrite, total dissolved nitrogen, total phosphorus, total  
370 dissolved phosphorus, total particulate phosphorus, and soluble reactive phosphorus were  
371 measured only on July 30<sup>th</sup>, September 10<sup>th</sup> and September 24<sup>th</sup> at both sites; however, none were  
372 significant explanatory variables of the virus communities on these dates. Interestingly, when the  
373 influence of environmental variables on the *Mimiviridae* community was assessed, chlorophyll a  
374 remained an explanatory variable, accounting for 37.8% of the variation in the *Mimiviridae*

375 community ( $F = 4.85$ ,  $\text{Pr}( >F ) = 0.018$ ). Of the parameters measured only on July 30<sup>th</sup>, September  
376 10<sup>th</sup> and September 24<sup>th</sup>, only particulate organic carbon (POC) significantly explained  
377 differences in the *Mimiviridae* communities between samples. In a separate CCA model, a test of  
378 719 permutations revealed that POC accounted for 59.6% of the variation in the *Mimiviridae*  
379 community on July 30<sup>th</sup>, September 10<sup>th</sup> and September 24<sup>th</sup> ( $F = 5.90$ ,  $\text{Pr}( >F ) = 0.043$ ).

380

## 381 DISCUSSION

### 382 *Influence of databases*

383 In this study we observed diverse virus communities that were both spatially and seasonally  
384 variable, and often dominated by virophages. However, as usual for environmental  
385 metagenomes, a large portion of sequences remained unclassified and were discarded at the  
386 annotation step of the data processing pipeline. This is especially the case for viruses, which  
387 have much fewer sequenced representatives in databases than prokaryotes or eukaryotes and are  
388 more likely to remain unannotated. For example, in May 2018, RefSeq release 88 contained  
389 >7500 viruses with >325,300 associated accessions (9648 nucleotide sequences and 315,742  
390 protein sequences). In contrast, there were >50,400 bacteria with >100,583,400 associated  
391 accessions (12,367,951 nucleotide sequences and 88,193,695 protein sequences) (data from:  
392 <ftp://ftp.ncbi.nlm.nih.gov/refseq/release/release-statistics/>). An estimated <1% of the Earth's  
393 virome has been discovered [48], and this underrepresentation in databases has a large influence  
394 on the reported diversity of viruses in metagenomes. The NCBI-nr database referenced in this  
395 study combines data from RefSeq as well as SwissProt, Protein Information Resource (PIR),  
396 Protein Databank (PDB), Protein Research Foundation (PRF), and GenBank. A combination of  
397 curated and non-curated sequences, the NCBI-nr database includes data from the assembly of

398 environmental metagenomes including those deposited by private institutions. The use of this  
399 database as opposed to a curated database drastically increases the size of the reference database,  
400 increasing the likelihood of annotation, which is especially valuable for identifying taxa with few  
401 sequenced representatives.

402

403 Within viral sequence databases, certain groups of viruses have many sequenced representatives,  
404 while others are represented by only a few sequences. For example, there are >2000 complete  
405 *Caudovirales* genomes, but only 7 complete virophage (*Lavidaviridae*) genomes (data from  
406 <https://www.ncbi.nlm.nih.gov/genomes/GenomesGroup.cgi>; retrieved December 2018). This  
407 bias results in a higher chance of detecting *Caudovirales* than virophages, which are more likely  
408 to be unannotated and discarded in downstream analyses. Additionally, viral groups with more  
409 sequenced representation are more likely to have accurate annotations at the level of discrete  
410 taxa. Hence, the disproportionately high abundance of virophages detected in Hamilton Harbour  
411 samples compared to reference databases reinforces the discovery of their relatively high  
412 representation in this system, and likely other freshwater environments.

413

#### 414 *Limitations of inferring virus presence and abundance from metagenomic datasets*

415 This research infers the presence and abundance of viruses based on the relative abundances of  
416 assembled contigs from shotgun sequencing. It is important to note that the presence of contigs  
417 annotated as viruses may not necessarily indicate their presence. The intimate evolutionary  
418 relationship between viruses and their hosts has resulted in an abundance of viral genes present  
419 in host genomes. Unless viral homologues in host genomes are specifically annotated as such,  
420 genetic similarity searches may incorrectly annotate them as viruses [49]. However, upon



421 examining the top 10 hits for individual contigs, there were few instances that contained a  
422 combination of bacteria and viruses; in most cases the top hits were all within the same virus  
423 family.

424

425 The concept of the “virocell” was introduced to distinguish between the living and non-living  
426 segments of the classical virus lifestyle [50]. The non-living portion of the virus lifecycle is the  
427 inactive virion that may become activated only if it contacts and infects a permissive host cell,  
428 while the living manifestation of a virus is the infectious and metabolically active intracellular  
429 portion of the virus lifecycle (i.e. the virocell). Counting viral contigs without distinguishing  
430 between active and inactive states may lead to an overestimation of the influence of viruses in a  
431 given environment if the data are not considered in light of this complex relationship between  
432 viruses and their hosts. Metagenomic research is limited by the inability to distinguish between  
433 viruses that are actively infecting hosts and virions that are inactive and simply adsorbed to cells  
434 or particles. Furthermore, in this study we could not distinguish between viruses integrated into  
435 host genomes and those present as virions. However, since DNA was extracted from the  $>0.22$   
436  $\mu\text{m}$  fraction rather than the traditional  $<0.22$   $\mu\text{m}$  fraction, it is less likely that the virus contigs  
437 captured were derived from free virions in the water column. Most free virions, except some of  
438 the largest NCLDVs, would have passed through the filters, and only those that were adsorbed to  
439 cells or other particulate matter would have been captured during sample collection. Though  
440 virophages are small and could pass through the filters if present as free particles in the water  
441 column, it is also possible that several virophages could be adsorbed to individual giant virus  
442 hosts. For example, the virophage Sputnik is frequently observed to be situated within the fibrils  
443 of its *Mamavirus* host and is speculated to use these fibrils in order to gain entry into the viral

444 host [51]. More research is required to confirm virophage host associations and methods of entry  
445 in order to adequately assess whether virophages commonly adsorb to their giant virus hosts, and  
446 what influence this may have on the interpretation of metagenomic data gathered in studies such  
447 as this. Regardless, the high abundance of virophages in the majority of Hamilton Harbour  
448 samples is indicative of their potential influence on the *Mimiviridae* and eukaryotic host  
449 communities in the harbour, and likely many other freshwater environments as well.

450

451 Though these observations contrast metagenomic studies in other freshwater lakes, it remains  
452 challenging to compare virus communities between studies due to differences in sampling,  
453 sequencing and data processing. Even the most widely-used analysis tools for metagenomic data  
454 yield different results [52], highlighting the need for standardized analysis tools and pipelines in  
455 order to facilitate ecologically relevant comparisons between studies.

456

#### 457 *Physiochemical factors*

458 Environmental variables that typically explain variation in virus communities on local scales,  
459 such as dissolved oxygen and temperature [6], were not significant explanatory variables of our  
460 data. This may be a reflection of virus dependence on host populations and the wide host ranges  
461 of virus families. For example, the *Mimiviridae* infect hosts ranging from heterotrophic protists  
462 like amoeba to photosynthetic protists, or algae, and because key resources for these eukaryotic  
463 microorganisms differ (DOC versus light), it might be anticipated that they respond differently to  
464 certain environmental factors. Nevertheless, the CCA model with chlorophyll a as a constrained  
465 variable explained 47.8% of the variation in the data, while other environmental parameters were  
466 insignificant. Therefore, it appears that fluctuations in algal biomass (inferred from chlorophyll a

467 concentration) play a major role in shaping the virus communities in Hamilton Harbour. For  
468 example, chlorophyll a was inversely related to *Caudovirales* relative abundance, indicating that  
469 most *Caudovirales* contigs were derived primarily from phages of heterotrophic bacteria. The  
470 mid-harbour samples from August 27<sup>th</sup> and September 24<sup>th</sup> had undetectable or very low (0.1  
471 µg/L) chlorophyll a concentrations, respectively, and the virus communities in these samples  
472 were dominated by *Caudovirales* and clustered closely together in both the CCA and the Bray-  
473 Curtis dissimilarity analyses. In contrast, the lowest chlorophyll a concentration noted for a  
474 nearshore sample was 2.7 µg/L, and the virus community in this sample (August 13<sup>th</sup>) was  
475 dominated by virophages and *Mimiviridae*. It is notable that the nearshore site is closer in  
476 proximity to wastewater effluents from Spencer Creek than the mid-harbour site. Although  
477 improvements have been made to the wastewater treatment plants surrounding Hamilton  
478 Harbour, effluents still contain phosphorus levels above targets set in the Hamilton Harbour  
479 Remedial Action Plan (HHRAP) [53]. These nutrient and organic carbon inputs might stimulate  
480 microbial growth at the nearshore site, in turn influencing virus communities.

481  
482 The CCA of different *Mimiviridae* taxa against environmental parameters revealed that  
483 chlorophyll a remained a significant explanatory variable of the *Mimiviridae* community,  
484 reflecting their wide host range which includes both photosynthetic and non-photosynthetic  
485 hosts. For example, the algal virus CeV made up a large portion of the *Mimiviridae* community  
486 at the mid-harbour site, while *Indivirus ILVI*, a member of the proposed subfamily  
487 ‘Klosneuvirinae’ that were themselves assembled from metagenome sequences, was abundant in  
488 nearshore samples and is a suspected protist virus [47]. POC explained almost 60% of the  
489 variation in the *Mimiviridae* communities on July 30<sup>th</sup>, September 10<sup>th</sup> and September 24<sup>th</sup>. Since

490 POC data were only available for 6 of the 10 samples, it is unclear whether POC would remain a  
491 significant explanatory variable if the model included data from all samples.

492

493 Hamilton Harbour is known to be a highly variable system [54] that experiences regular seiches  
494 [55] and exchange flows with Lake Ontario, especially during the summer [27]. Circulation and  
495 mixing in the harbour are primarily controlled by prevailing winds [56]. Modelling of summer  
496 circulation patterns in Hamilton Harbour demonstrated the occurrence of a large eddy in the  
497 middle of the harbour at the location of our mid-harbour site, while the nearshore site was  
498 situated on the perimeter of a smaller eddy located at western end of the bay near Cootes  
499 Paradise [57]. The location of the sampling sites with respect to these eddies and Hamilton  
500 Harbour circulation may explain differences in virus community composition observed at the  
501 different sites on the same day. Hamilton Harbour is a major Canadian shipping port and large  
502 ships entering the harbour from Lake Ontario likely pass through the mid-harbour site on route to  
503 the port on the southern shore. Shipping traffic is one of the many factors potentially affecting  
504 virus community variability on the sampling dates that could not be considered in the present  
505 study. Given the high variability of Hamilton Harbour, it is perhaps unsurprising that the virus  
506 communities varied widely between sampling sites and dates. More unexpected was the  
507 relatively stable community throughout the mid-summer to late fall at the nearshore site, when  
508 bacterial and phytoplankton populations have been observed to be highly dynamic [58-60].

509

### 510 *The virophages*

511 Virophages are small dsDNA viruses that co-infect eukaryotic hosts with giant dsDNA viruses  
512 [61]. Their co-infection has been shown to reduce giant virus fitness, thereby increasing survival

513 of the cellular host [62,63]. Virophages were discovered only a decade ago [63], and little is  
514 known about their ecology. There is evidence to suggest that virophage-induced reduction of  
515 algal host mortality leads to longer and more frequent algal blooms [64], highlighting the  
516 ecological importance of virophages and their potential relevance to our eutrophic study site.  
517  
518 Virophage abundance in freshwater eutrophic lakes varies widely and has been reported as  
519 highly abundant in some environments [26], yet only detected at low abundances (<0.05%) [20],  
520 or even undetectable in other lakes [22]. Virophage abundances and distributions in lakes do not  
521 have clear seasonal or annual patterns of abundance, nor are there established relationships  
522 between dominant types of virophages in different environments [26]. In contrast to previous  
523 studies of viruses in eutrophic freshwater lakes, virophages were dominant in most samples from  
524 Hamilton Harbour. About 80% of the virophage community was annotated as Dishui Lake  
525 virophages in 7 of 10 samples regardless of date or site. Dishui Lake, China is a eutrophic  
526 freshwater lake that is more similar to Hamilton Harbour than the lakes where other types of  
527 virophages were observed such as Organic Lake, an Antarctic hypersaline lake, Qinghai Lake, a  
528 saline endorheic basin, or Yellowstone Lake, a lake that receives geothermal inputs. Due in part  
529 to their relatively recent discovery, sequence databases are limited with respect to the amount of  
530 information available for virophages, hence, specific virophage annotations in our samples may  
531 not be accurate. It is likely that the large portion of the virophage community annotated as Dishui  
532 Lake virophages are in fact a diverse array of virophages. The breakdown into discrete taxa did,  
533 however, reveal which virophages in reference databases were most similar to those detected in  
534 our dataset.  
535

536 Other considerations that may impact the accuracy of virophage annotations include the presence  
537 of polintons/polintoviruses, polinton-like viruses and transpovirons (reviewed in [65]). Related to  
538 virophages, polintons/polintoviruses are self-synthesizing transposons that have genes  
539 homologous to virophages and giant viruses and are frequently integrated into eukaryotic  
540 genomes. Polinton-like viruses (PLV) are related to polintons and are commonly integrated into  
541 the genomes of green algae [65]. Mimiviruses can also be infected by transpovirons, which are  
542 small, dsDNA parasites that share homologous genes with virophages. During mimivirus  
543 reproduction, numerous transpovirons can accumulate within the host cytoplasm, within  
544 mimivirus particles, and within virophage particles. They also have the ability to integrate into  
545 the genomes of mimiviruses [66]. Considering their evolutionary relatedness and the presence of  
546 homologous genes in conjunction with the limitations of available databases, it would not be  
547 surprising to find that some of the virophages detected in our samples may in fact be  
548 polintons/polintoviruses, PLVs, or transpovirons. Further exploration and sequencing of  
549 virophage, polinton, PLV and transpoviron diversity is required to expand databases and improve  
550 accuracy of identification of these entities in metagenomic datasets. As a final comment on  
551 virophages, recent genome sequencing of a giant virus isolated from Lake Ontario revealed the  
552 presence of three putative virophages [67]. This giant virus and associated virophages infect the  
553 freshwater haptophyte *Chrysochromulina parva*; the *C. parva* virus is a close relative to the  
554 Hamilton Harbour mimivirus contigs annotated as *Chrysochromulina ericinia* virus. This  
555 observation supports the notion that the contigs assembled from Hamilton Harbour represent  
556 bona fide mimivirus-parasitizing virophages.

557

558

559 *Ecological relevance*

560 The importance of viruses in aquatic environments is well documented. They are estimated to  
561 kill approximately 10% of the phytoplankton population and up to 50% of the bacterial  
562 population in surface marine waters, with greater impacts in high nutrient environments [68].  
563 Especially in eutrophic aquatic systems, viruses are more active and are hypothesized to control  
564 host abundance, respiration and production [69]. They drive host community succession by  
565 targeting and lysing abundant members of the community, allowing less competitive species to  
566 thrive [70], and influencing fluctuations in dissolved and particulate organic matter pools.  
567 Viruses also act as key gene transfer agents that permit host adaptation and drive the evolution of  
568 microbial communities [71].

569

570 While marine viruses have been studied extensively over the past decade, freshwater viruses  
571 have received relatively little attention. Fundamental aspects of freshwater virus ecology, such as  
572 their distribution and patchiness in freshwater environments remain unknown. To our  
573 knowledge, this research is the first report of virus communities in Hamilton Harbour, and one of  
574 the few studies of virus communities in the Great Lakes. On some dates (e.g. September 24<sup>th</sup>)  
575 virus community composition was very different over the 3-km distance between the sites, while  
576 on other dates (e.g. September 10<sup>th</sup>), the community composition was very similar. At the level  
577 of virus families, relative abundances fluctuated at the mid-harbour site much more than the  
578 nearshore site, highlighting the high diversity of viruses on local scales and the impacts of small-  
579 scale environmental differences.

580

581 Since the recent discoveries of the *Mimiviridae* and their virophages, few studies have looked at  
582 the relative abundances of these groups over the duration of a season. We captured fluctuations  
583 in the *Mimiviridae* community over the summer and observed vastly different communities on  
584 the same date at different locations in the harbour. The stability of the virophage community  
585 abundance throughout the nearshore samples despite the changing *Mimiviridae* community was  
586 unexpected as *Mimiviridae* are the only known virus hosts of virophages [72]. While the  
587 nearshore and mid-harbour samples generally contained distinct *Mimiviridae* communities, the  
588 virophage community composition remained consistent. This highlights the complexity of these  
589 ecological relationships, and the gaps in our understanding of how these intimately associated  
590 viruses interact. The stability of virophage community composition despite the fluctuating  
591 *Mimiviridae* community appears to support the hypothesis that virophages and their *Mimiviridae*  
592 hosts are not connected solely by infection. The notion that virophages may enter eukaryotic host  
593 cells independently, remaining latent until infection by a giant virus, where they then compete  
594 with the giant virus for its replication machinery [72] is a possible explanation of the wide range  
595 of abundances in the virophage community while the *Mimiviridae* community remained  
596 relatively stable.

597

598 Given that Hamilton Harbour is known to support high algal biomass in the summer and early  
599 autumn months, it was surprising that the *Phycodnaviridae* were observed at low relative  
600 abundances in all samples collected for this study. Instead, *Mimiviridae* appeared to be the  
601 dominant algal viruses in Hamilton Harbour. The most common algae-infecting *Mimiviridae*  
602 were CeV, which were especially abundant at the mid-harbour site. The “Other dsDNA viruses”  
603 category did not contribute more than 4% in any individual sample and included mostly



604 *Mimiviridae*. The small percentage of ssDNA viruses that were detected represent only those that  
605 were replicating in cells in the dsDNA form, since only dsDNA was targeted in the library  
606 preparation and sequencing. Therefore, the ssDNA viruses may be underrepresented compared to  
607 other virus groups which were detected as inactive virions adsorbed to particles in addition to  
608 active viruses replicating within cells.

609

## 610 CONCLUSIONS

611 Overall, Hamilton Harbour metagenomes included a diverse array of viruses ranging from large  
612 dsDNA *Mimiviridae* to small ssDNA viruses. Relative abundances of virus families varied  
613 widely over relatively small spatial scales within the harbour, with higher consistency in the  
614 nearshore samples compared to the mid-harbour samples. Virophage relative abundances ranged  
615 widely across all samples and were the most abundant virus family in most samples. Though  
616 *Mimiviridae* are presumably intimately associated with virophages, their abundances did not  
617 fluctuate to the same extent as the virophages. A wide diversity of *Mimiviridae* were detected in  
618 the samples, and the two sites appeared to host distinct *Mimiviridae* communities. The  
619 abundances of discrete virophage taxa were remarkably stable despite the dissimilar *Mimiviridae*  
620 communities at the two sites, highlighting our limited understanding of how these intimately  
621 associated viruses interact. Equally unexpected was the low abundance of *Caudovirales* in most  
622 samples, contrasting other studies of freshwater virus communities. *Phycodnaviridae* abundances  
623 were also surprisingly low in all samples despite Hamilton Harbour's capacity to support high  
624 algal biomass during the summer and autumn months, suggesting that *Mimiviridae* are the  
625 dominant algae-infecting viruses in this system. These findings provide insight into virus  
626 community structures in freshwater environments, expanding the documented diversity of

627 freshwater virus communities, highlighting the potential ecological importance of virophages,  
628 and revealing distinct communities over small spatial scales.

629

## 630 SUPPLEMENTARY MATERIALS

631 **Table S.1:** List of original taxonomic annotations and re-assigned taxonomic affiliations of virus  
632 contigs in Hamilton Harbour metagenomes.

633

## 634 ACKNOWLEDGMENTS

635 This work was supported in part by an NSERC Discovery Grant (#RGPIN-2016-06022) awarded  
636 to S.M.S. and an Ontario Graduate Scholarship (OGS) awarded to C.N.P. Hamilton Harbour  
637 sampling, DNA extraction and metagenomic sequencing was funded by Environment Canada.  
638 Environmental parameters were collected and measured by researchers at York University (Dr.  
639 Lewis Molot's group) and Environment Canada (Dr. Susan Watson's group). These samples  
640 were processed by the staff at the National Laboratory for Environmental Testing (NLET). Our  
641 appreciation to Dr. Daniel Huson for correspondence regarding data processing in DIAMOND  
642 and MEGAN6-LR.

643

## 644 AUTHOR CONTRIBUTIONS

645 Conceptualization, C.N.P. and S.M.S.; Methodology, C.N.P., R.R.F., R.S., and S.M.S.;  
646 Validation, C.N.P. and S.M.S.; Formal Analysis, C.N.P. and S.M.S.; Investigation, C.N.P.,  
647 R.R.F., R.S., and S.M.S.; Resources, R.R.F. and S.M.S.; Data Curation, C.N.P. and S.M.S.;

648 Writing – Original Draft Preparation, C.N.P. and S.M.S; Writing – Review & Editing, C.N.P.,  
649 R.R.F., R.S., and S.M.S.; Visualization, C.N.P. and S.M.S.; Supervision, R.R.F. and S.M.S.;  
650 Project Administration, R.R.F. and S.M.S.; Funding Acquisition, R.R.F. and S.M.S.

651

## 652 CONFLICTS OF INTEREST

653 The authors declare no conflicts of interest.

654

## 655 REFERENCES

- 656 1. Jacquet, S.; Miki, T.; Noble, R.; Peduzzi, P.; Wilhelm, S. Viruses in aquatic ecosystems:  
657 important advancements of the last 20 years and prospects for the future in the field of  
658 microbial oceanography and limnology. *Advances in Oceanography and Limnology*  
659 **2010**, *1*, 97-141, doi:10.1080/19475721003743843.
- 660 2. Bergh, O.; Borsheim, K.Y.; Bratbak, G.; Heldal, M. High abundance of viruses found in  
661 aquatic environments. *Nature* **1989**, *340*, 467-468, doi:10.1038/340467a0.
- 662 3. Wommack, K.E.; Bhavsar, J.; Polson, S.W.; Chen, J.; Dumas, M.; Srinivasiah, S.;  
663 Furman, M.; Jamindar, S.; Nasko, D.J. VIROME: a standard operating procedure for  
664 analysis of viral metagenome sequences. *Standards in Genomic Sciences* **2012**, *6*, 421-  
665 433, doi:10.4056/sigs.2945050.
- 666 4. Breitbart, M.; Salamon, P.; Andresen, B.; Mahaffy, J.M.; Segall, A.M.; Mead, D.; Azam,  
667 F.; Rohwer, F. Genomic analysis of uncultured marine viral communities. *Proceedings of*  
668 *the National Academy of Sciences of the United States of America* **2002**, *99*, 14250-  
669 14255, doi:10.1073/pnas.202488399.
- 670 5. Brum, J.R.; Sullivan, M.B. Rising to the challenge: accelerated pace of discovery  
671 transforms marine virology. *Nature Reviews Microbiology* **2015**, *13*, 147-159,  
672 doi:10.1038/nrmicro3404.
- 673 6. Brum, J.R.; Ignacio-Espinoza, J.C.; Roux, S.; Doucier, G.; Acinas, S.G.; Alberti, A.;  
674 Chaffron, S.; Cruaud, C.; de Vargas, C.; Gasol, J.M., et al. Patterns and ecological drivers  
675 of ocean viral communities. *Science* **2015**, *348*, doi:10.1126/science.1261498.
- 676 7. de Vargas, C.; Audic, S.; Henry, N.; Decelle, J.; Mahe, F.; Logares, R.; Lara, E.; Berney,  
677 C.; Le Bescot, N.; Probert, I., et al. Eukaryotic plankton diversity in the sunlit ocean.  
678 *Science* **2015**, *348*, doi:10.1126/science.1261605.
- 679 8. Lima-Mendez, G.; Faust, K.; Henry, N.; Decelle, J.; Colin, S.; Carcillo, F.; Chaffron, S.;  
680 Ignacio-Espinoza, J.C.; Roux, S.; Vincent, F., et al. Determinants of community structure  
681 in the global plankton interactome. *Science* **2015**, *348*, doi:10.1126/science.1262073.

- 682 9. Sunagawa, S.; Coelho, L.P.; Chaffron, S.; Kultima, J.R.; Labadie, K.; Salazar, G.;  
683 Djahanschiri, B.; Zeller, G.; Mende, D.R.; Alberti, A., et al. Structure and function of the  
684 global ocean microbiome. *Science* **2015**, *348*, doi:10.1126/science.1261359.
- 685 10. Villar, E.; Farrant, G.K.; Follows, M.; Garczarek, L.; Speich, S.; Audic, S.; Bittner, L.;  
686 Blanke, B.; Brum, J.R.; Brunet, C., et al. Environmental characteristics of Agulhas rings  
687 affect interocean plankton transport. *Science* **2015**, *348*, doi:10.1126/science.1261447.
- 688 11. Breitbart, M.; Rohwer, F. Here a virus, there a virus, everywhere the same virus? *Trends*  
689 *Microbiol.* **2005**, *13*, 278-284, doi:10.1016/j.tim.2005.04.003.
- 690 12. Hingamp, P.; Grimsley, N.; Acinas, S.G.; Clerissi, C.; Subirana, L.; Poulain, J.; Ferrera,  
691 I.; Sarmiento, H.; Villar, E.; Lima-Mendez, G., et al. Exploring nucleo-cytoplasmic large  
692 DNA viruses in Tara Oceans microbial metagenomes. *ISME J* **2013**, *7*, 1678-1695,  
693 doi:10.1038/ismej.2013.59.
- 694 13. Duarte, C.M. Seafaring in the 21st Century: The Malaspina 2010 Circumnavigation  
695 Expedition. *Limnol Oceanogr Bull* **2015**, *24*, 11-14. doi:10.1002/lob.10008.
- 696 14. Roux, S.; Brum, J.R.; Dutilh, B.E.; Sunagawa, S.; Duhaime, M.B.; Loy, A.; Poulos, B.T.;  
697 Solonenko, N.; Lara, E.; Poulain, J., et al. Ecogenomics and potential biogeochemical  
698 impacts of globally abundant ocean viruses. *Nature* **2016**, *537*, 689-693,  
699 doi:10.1038/nature19366.
- 700 15. Djikeng, A.; Kuzmickas, R.; Anderson, N.G.; Spiro, D.J. Metagenomic Analysis of RNA  
701 Viruses in a Fresh Water Lake. *Plos One* **2009**, *4*, doi:10.1371/journal.pone.0007264.
- 702 16. Hewson, I.; Barbosa, J.G.; Brown, J.M.; Donelan, R.P.; Eaglesham, J.B.; Eggleston,  
703 E.M.; LaBarre, B.A. Temporal Dynamics and Decay of Putatively Allochthonous and  
704 Autochthonous Viral Genotypes in Contrasting Freshwater Lakes. *Applied and*  
705 *Environmental Microbiology* **2012**, *78*, 6583-6591, doi:10.1128/aem.01705-12.
- 706 17. Roux, S.; Enault, F.; Robin, A.; Ravet, V.; Personnic, S.; Theil, S.; Colombet, J.; Sime-  
707 Ngando, T.; Debrosas, D. Assessing the Diversity and Specificity of Two Freshwater Viral  
708 Communities through Metagenomics. *Plos One* **2012**, *7*,  
709 doi:10.1371/journal.pone.0033641.
- 710 18. de Carcer, D.A.; Lopez-Bueno, A.; Pearce, D.A.; Alcamí, A. Biodiversity and distribution  
711 of polar freshwater DNA viruses. *Science Advances* **2015**, *1*, doi:10.1126/sciadv.1400127.
- 712 19. Mohiuddin, M.; Schellhorn, H.E. Spatial and temporal dynamics of virus occurrence in  
713 two freshwater lakes captured through metagenomic analysis. *Frontiers in Microbiology*  
714 **2015**, *6*, doi:10.3389/fmicb.2015.00960.
- 715 20. Green, J.C.; Rahman, F.; Saxton, M.A.; Williamson, K.E. Metagenomic assessment of  
716 viral diversity in Lake Matoaka, a temperate, eutrophic freshwater lake in southeastern  
717 Virginia, USA. *Aquatic Microbial Ecology* **2015**, *75*, 117-128, doi:10.3354/ame01752.
- 718 21. Sible, E.; Cooper, A.; Malki, K.; Bruder, K.; Watkins, S.C.; Fofanov, Y.; Putonti, C.  
719 Survey of viral populations within Lake Michigan nearshore waters at four Chicago area  
720 beaches. *Data Brief* **2015**, *5*, 9-12, doi:10.1016/j.dib.2015.08.001.
- 721 22. Skvortsov, T.; de Leeuwe, C.; Quinn, J.P.; McGrath, J.W.; Allen, C.C.; McElarney, Y.;  
722 Watson, C.; Arkhipova, K.; Lavigne, R.; Kulakov, L.A. Metagenomic Characterisation of  
723 the Viral Community of Lough Neagh, the Largest Freshwater Lake in Ireland. *PLoS One*  
724 **2016**, *11*, e0150361, doi:10.1371/journal.pone.0150361.
- 725 23. Ge, X.; Wu, Y.; Wang, M.; Wang, J.; Wu, L.; Yang, X.; Zhang, Y.; Shi, Z. Viral  
726 metagenomics analysis of planktonic viruses in East Lake, Wuhan, China. *Virol Sin* **2013**,  
727 *28*, 280-290, doi:10.1007/s12250-013-3365-y.

- 728 24. de Carcer, D.A.; Lopez-Bueno, A.; Alonso-Lobo, J.M.; Quesada, A.; Alcamí, A.  
729 Metagenomic analysis of lacustrine viral diversity along a latitudinal transect of the  
730 Antarctic Peninsula. *Fems Microbiology Ecology* **2016**, *92*, doi:10.1093/femsec/fiw074.
- 731 25. Lopez-Bueno, A.; Tamames, J.; Velazquez, D.; Moya, A.; Quesada, A.; Alcamí, A. High  
732 Diversity of the Viral Community from an Antarctic Lake. *Science* **2009**, *326*, 858-861,  
733 doi:10.1126/science.1179287.
- 734 26. Roux, S.; Chan, L.K.; Egan, R.; Malmstrom, R.R.; McMahon, K.D.; Sullivan, M.B.  
735 Ecogenomics of virophages and their giant virus hosts assessed through time series  
736 metagenomics. *Nature Communications* **2017**, *8*, doi:10.1038/s41467-017-01086-2.
- 737 27. Lawrence, G.; Pieters, R.; Zaremba, L.; Tedford, T.; Gu, L.; Greco, S.; Hamblin, P.  
738 Summer exchange between Hamilton Harbour and Lake Ontario. *Deep Sea Research*  
739 *Part II: Topical Studies in Oceanography* **2004**, *51*, 475-487,  
740 doi:10.1016/j.dsr2.2003.09.002.
- 741 28. CPCS. Hamilton's Working Waterfront: Port of Hamilton Economic Impact Study. **2016**.  
742 Available online: [https://economy.hamiltonport.ca/wp-](https://economy.hamiltonport.ca/wp-content/uploads/2016/11/PortOfHamilton_Economic_Impact_Report_Oct_2016.pdf)  
743 [content/uploads/2016/11/PortOfHamilton\\_Economic\\_Impact\\_Report\\_Oct\\_2016.pdf](https://economy.hamiltonport.ca/wp-content/uploads/2016/11/PortOfHamilton_Economic_Impact_Report_Oct_2016.pdf).
- 744 29. IJC. Report on the ongoing remedial and preventive efforts by responsible governments  
745 and organizations relative to restoring Hamilton Harbour. **1999**. Available online:  
746 <http://ijc.org/php/publications/html/hamhar/hamharsa.html>.
- 747 30. Poulton, D.J. Trace Contaminant Status of Hamilton Harbour. *Journal of Great Lakes*  
748 *Research* **1987**, *13*, 193-201, doi:10.1016/s0380-1330(87)71642-6.
- 749 31. ECCC. Canadian Environmental Sustainability Indicators: Restoring the Great Lakes  
750 Areas of Concern. **2018**. Available online: [www.canada.ca/en/environment-climate-](http://www.canada.ca/en/environment-climate-change/services/environmentalindicators/restoring-great-lakes-areas-concern.html)  
751 [change/services/environmentalindicators/restoring-great-lakes-areas-concern.html](http://www.canada.ca/en/environment-climate-change/services/environmentalindicators/restoring-great-lakes-areas-concern.html).
- 752 32. Andrews, S. FastQC: a quality control tool for high throughput sequence data. **2010**.  
753 Available online: <http://www.bioinformatics.babraham.ac.uk/projects/fastqc>.
- 754 33. Joshi, N.A.; Fass, J.N. Sickle: A sliding-window, adaptive, quality-based trimming tool  
755 for FastQ files (Version 1.33) [Software]. **2011**. Available online:  
756 <https://github.com/najoshi/sickle>.
- 757 34. Peng, Y.; Leung, H.C.M.; Yiu, S.M.; Chin, F.Y.L. IDBA-UD: a de novo assembler for  
758 single-cell and metagenomic sequencing data with highly uneven depth. *Bioinformatics*  
759 **2012**, *28*, 1420-1428, doi:10.1093/bioinformatics/bts174.
- 760 35. Buchfink, B., Xie, C., & Huson, D. H. Fast and sensitive protein alignment using  
761 DIAMOND. *Nature Methods* **2015**, *12*, 59-63, doi:10.1038/nmeth.3176.
- 762 36. Huson, D.H.; Albrecht, B.; Bagci, C.; Bessarab, I.; Gorska, A.; Jolic, D.; Williams,  
763 R.B.H. MEGAN-LR: new algorithms allow accurate binning and easy interactive  
764 exploration of metagenomic long reads and contigs. *Biology Direct* **2018**, *13*,  
765 doi:10.1186/s13062-018-0208-7.
- 766 37. Langmead, B.; Salzberg, S.L. Fast gapped-read alignment with Bowtie 2. *Nature*  
767 *Methods* **2012**, *9*, 357-U354, doi:10.1038/nmeth.1923.
- 768 38. Li, H.; Handsaker, B.; Wysoker, A.; Fennell, T.; Ruan, J.; Homer, N.; Marth, G.;  
769 Abecasis, G.; Durbin, R.; Genome Project Data Processing, S. The Sequence  
770 Alignment/Map format and SAMtools. *Bioinformatics* **2009**, *25*, 2078-2079,  
771 doi:10.1093/bioinformatics/btp352.
- 772 39. Gallot-Lavallee, L.; Blanc, G.; Claverie, J.-M. Comparative Genomics of  
773 Chrysochromulina Ericina Virus and Other Microalga-Infecting Large DNA Viruses



- 774 Highlights Their Intricate Evolutionary Relationship with the Established Mimiviridae  
775 Family. *Journal of Virology* **2017**, *91*, doi:10.1128/jvi.00230-17.
- 776 40. Maruyama, F.; Ueki, S. Evolution and Phylogeny of Large DNA Viruses, Mimiviridae  
777 and Phycodnaviridae Including Newly Characterized Heterosigma akashiwo Virus.  
778 *Frontiers in Microbiology* **2016**, *7*, doi:10.3389/micb.2016.01942.
- 779 41. Claverie, J.-M.; Abergel, C. Mimiviridae: An Expanding Family of Highly Diverse Large  
780 dsDNA Viruses Infecting a Wide Phylogenetic Range of Aquatic Eukaryotes. *Viruses-*  
781 *Basel* **2018**, *10*, doi:10.3390/v10090506.
- 782 42. Moniruzzaman, M.; LeCleir, G.R.; Brown, C.M.; Gobler, C.J.; Bidle, K.D.; Wilson,  
783 W.H.; Wilhelm, S.W. Genome of brown tide virus (AaV), the little giant of the  
784 Megaviridae, elucidates NCLDV genome expansion and host-virus coevolution. *Virology*  
785 **2014**, *466*, 60-70, doi:10.1016/j.virol.2014.06.031.
- 786 43. Yutin, N.; Colson, P.; Raoult, D.; Koonin, E.V. Mimiviridae: clusters of orthologous  
787 genes, reconstruction of gene repertoire evolution and proposed expansion of the giant  
788 virus family. *Virology Journal* **2013**, *10*, doi:10.1186/1743-422x-10-106.
- 789 44. Short, S.M., Staniewski, M. A., Chaban, Y. V., Long, A. M., & Wang, D. The Diversity of  
790 Viruses Infecting Eukaryotic Algae. In *Viruses of Microorganisms: Diversity, Molecular*  
791 *Biology and Application*; Hymen, P., & Abedon, S., Eds.; Caister Academic Press:  
792 Norfolk, UK, 2018; p. 211-244.
- 793 45. Wickham, H. *ggplot2: elegant graphics for data analysis*; Springer: New York, USA,  
794 2009.
- 795 46. Oksanen, J.; Blanchet, F.G.; Friendly, M.; Kindt, R.; Legendre, P.; McGlinn, D.; Minchin,  
796 P.R.; O'Hara, R.B.; Simpson, G.L.; Solymos, P., et al. vegan: Community Ecology  
797 Package. *R package version 2.4-5* **2017**. Available online: [https://CRAN.R-](https://CRAN.R-project.org/package=vegan)  
798 [project.org/package=vegan](https://CRAN.R-project.org/package=vegan).
- 799 47. Schulz, F.; Yutin, N.; Ivanova, N.N.; Ortega, D.R.; Lee, T.K.; Vierheilig, J.; Daims, H.;  
800 Horn, M.; Wagner, M.; Jensen, G.J., et al. Giant viruses with an expanded complement of  
801 translation system components. *Science* **2017**, *356*, 82-85, doi:10.1126/science.aal4657.
- 802 48. Mokili, J.L.; Rohwer, F.; Dutilh, B.E. Metagenomics and future perspectives in virus  
803 discovery. *Current Opinion in Virology* **2012**, *2*, 63-77, doi:10.1016/j.coviro.2011.12.004.
- 804 49. Forterre, P. The virocell concept and environmental microbiology. *Isme J.* **2013**, *7*, 233-  
805 236, doi:10.1038/ismej.2012.110.
- 806 50. Forterre, P. Manipulation of cellular syntheses and the nature of viruses: The virocell  
807 concept. *Comptes Rendus Chimie* **2011**, *14*, 392-399, doi:10.1016/j.crci.2010.06.007.
- 808 51. Desnues, C.; Raoult, D. Inside the Lifestyle of the Virophage. *Intervirology* **2010**, *53*,  
809 293-303, doi:10.1159/000312914.
- 810 52. Lindgreen, S.; Adair, K.L.; Gardner, P.P. An evaluation of the accuracy and speed of  
811 metagenome analysis tools. *Scientific Reports* **2016**, *6*, doi:10.1038/srep19233.
- 812 53. Posedowski, B. *Dundas Wastewater Treatment Plant and Cootes Paradise*; City of  
813 Hamilton Public Works Department: Hamilton, Canada, 2018. Available online:  
814 <https://pub-hamilton.escribemeetings.com/filestream.ashx?DocumentId=150416>.
- 815 54. Haffner, G.D.; Harris, G.P.; Jarai, M.K. Physical variability and phytoplankton  
816 communities 3. Vertical structure in phytoplankton populations. *Archiv Fur*  
817 *Hydrobiologie* **1980**, *89*, 363-381.

- 818 55. Wu, J.; Tsanis, I.K.; Chiocchio, F. Observed currents and water levels in Hamilton  
819 Harbour. *Journal of Great Lakes Research* **1996**, *22*, 224-240, doi:10.1016/s0380-  
820 1330(96)70951-6.
- 821 56. Yerubandi, R.R.; Marvin, C.H.; Zhao, J. Application of a numerical model for circulation,  
822 temperature and pollutant distribution in Hamilton Harbour. *Journal of Great Lakes*  
823 *Research* **2009**, *35*, 61-73, doi:10.1016/j.jglr.2008.09.004.
- 824 57. Yerubandi, R.R.; Boegman, L.; Bolkhari, H.; Hiriart-Baer, V. Physical processes affecting  
825 water quality in Hamilton Harbour. *Aquatic Ecosystem Health & Management* **2016**, *19*,  
826 114-123, doi:10.1080/14634988.2016.1165035.
- 827 58. Munawar, M.; Fitzpatrick, M. Microbial - Planktonic foodweb dynamics of a eutrophic  
828 Area of Concern: Hamilton Harbour. *Aquatic Ecosystem Health & Management* **2017**,  
829 *20*, 214-229, doi:10.1080/14634988.2017.1305865.
- 830 59. Munawar, M.; Fitzpatrick, M.; Niblock, H.; Kling, H.; Rozon, R.; Lorimer, J.  
831 Phytoplankton ecology of a culturally eutrophic embayment: Hamilton Harbour, Lake  
832 Ontario. *Aquatic Ecosystem Health & Management* **2017**, *20*, 201-213,  
833 doi:10.1080/14634988.2017.1307678.
- 834 60. Saati, R. Characterization of the Cyanobacterial Harmful Algal Bloom Community in  
835 Hamilton Harbour, Lake Ontario. MSc, University of Toronto, Canada, November 2016.
- 836 61. Krupovic, M.; Koonin, E.V. Self-synthesizing transposons: unexpected key players in the  
837 evolution of viruses and defense systems. *Current Opinion in Microbiology* **2016**, *31*, 25-  
838 33, doi:10.1016/j.mib.2016.01.006.
- 839 62. Claverie, J.M.; Abergel, C. Mimivirus and its Virophage. In *Annual Review of Genetics*,  
840 2009; Vol. 43, pp. 49-66. doi: 10.1146/annurev-genet-102108-134255.
- 841 63. La Scola, B.; Desnues, C.; Pagnier, I.; Robert, C.; Barrassi, L.; Fournous, G.; Merchat,  
842 M.; Suzan-Monti, M.; Forterre, P.; Koonin, E., et al. The virophage as a unique parasite  
843 of the giant mimivirus. *Nature* **2008**, *455*, 100-U165, doi:10.1038/nature07218.
- 844 64. Yau, S.; Lauro, F.M.; DeMaere, M.Z.; Brown, M.V.; Thomas, T.; Raftery, M.J.; Andrews-  
845 Pfannkoch, C.; Lewis, M.; Hoffman, J.M.; Gibson, J.A., et al. Virophage control of  
846 antarctic algal host-virus dynamics. *Proc Natl Acad Sci U S A* **2011**, *108*, 6163-6168,  
847 doi:10.1073/pnas.1018221108.
- 848 65. Koonin, E.V.; Krupovic, M. Polintons, virophages and transpovirons: a tangled web  
849 linking viruses, transposons and immunity. *Current Opinion in Virology* **2017**, *25*, 7-15,  
850 doi:10.1016/j.coviro.2017.06.008.
- 851 66. Desnues, C.; La Scola, B.; Yutin, N.; Fournous, G.; Robert, C.; Azza, S.; Jardot, P.;  
852 Monteil, S.; Campocasso, A.; Koonin, E.V., et al. Provirophages and transpovirons as the  
853 diverse mobilome of giant viruses. *Proc Natl Acad Sci U S A* **2012**, *109*, 18078-18083,  
854 doi:10.1073/pnas.1208835109.
- 855 67. Stough, J.M.A.; Yutin, N.; Chaban, Y.V.; Moniruzzaman, M.; Gann, E.R.; Pound, H.L.;  
856 Steffen, M.M.; Black, J.N.; Koonin, E.V.; Wilhelm, S.W., et al. Genome and  
857 Environmental Activity of a Chrysochromulina parva Virus and Its Virophages. *Frontiers*  
858 *in Microbiology* **2019**, *10*, doi:10.3389/fmicb.2019.00703.
- 859 68. Fuhrman, J.A. Marine viruses and their biogeochemical and ecological effects. *Nature*  
860 **1999**, *399*, 541-548, doi:10.1038/21119.
- 861 69. Liu, H.; Yuan, X.C.; Xu, J.; Harrison, P.J.; He, L.; Yin, K.D. Effects of viruses on  
862 bacterial functions under contrasting nutritional conditions for four species of bacteria  
863 isolated from Hong Kong waters. *Scientific Reports* **2015**, *5*, doi:10.1038/srep14217.

- 864 70. Wilhelm, S.W.; Suttle, C.A. Viruses and Nutrient Cycles in the Sea - Viruses play critical  
865 roles in the structure and function of aquatic food webs. *Bioscience* **1999**, *49*, 781-788,  
866 doi:10.2307/1313569.
- 867 71. Filee, J.; Forterre, P.; Laurent, J. The role played by viruses in the evolution of their hosts:  
868 a view based on informational protein phylogenies. *Research in Microbiology* **2003**, *154*,  
869 237-243, doi:10.1016/s0923-2508(03)00066-4.
- 870 72. Sobhy, H. Virophages and Their Interactions with Giant Viruses and Host Cells.  
871 *Proteomes* **2018**, *6*, doi:10.3390/proteomes6020023.
- 872
